# Supplementary material for: The LIM domain protein nTRIP6 acts as a co-repressor for the transcription factor MEF2C in myoblasts
Source: PubMed Central journal article supplement (PMC4904203; doi:10.1038/srep27746), 2016-06-13
Supplement: srep27746-s1.pdf [file srep27746-s1.pdf]

# The LIM domain protein nTRIP6 acts as a co-repressor for the transcription factor MEF2C in myoblasts

Denise Kemler, Oliver Dahley, Sven Roßwag, Margarethe Litfin, Olivier Kassel

## Supplementary figures

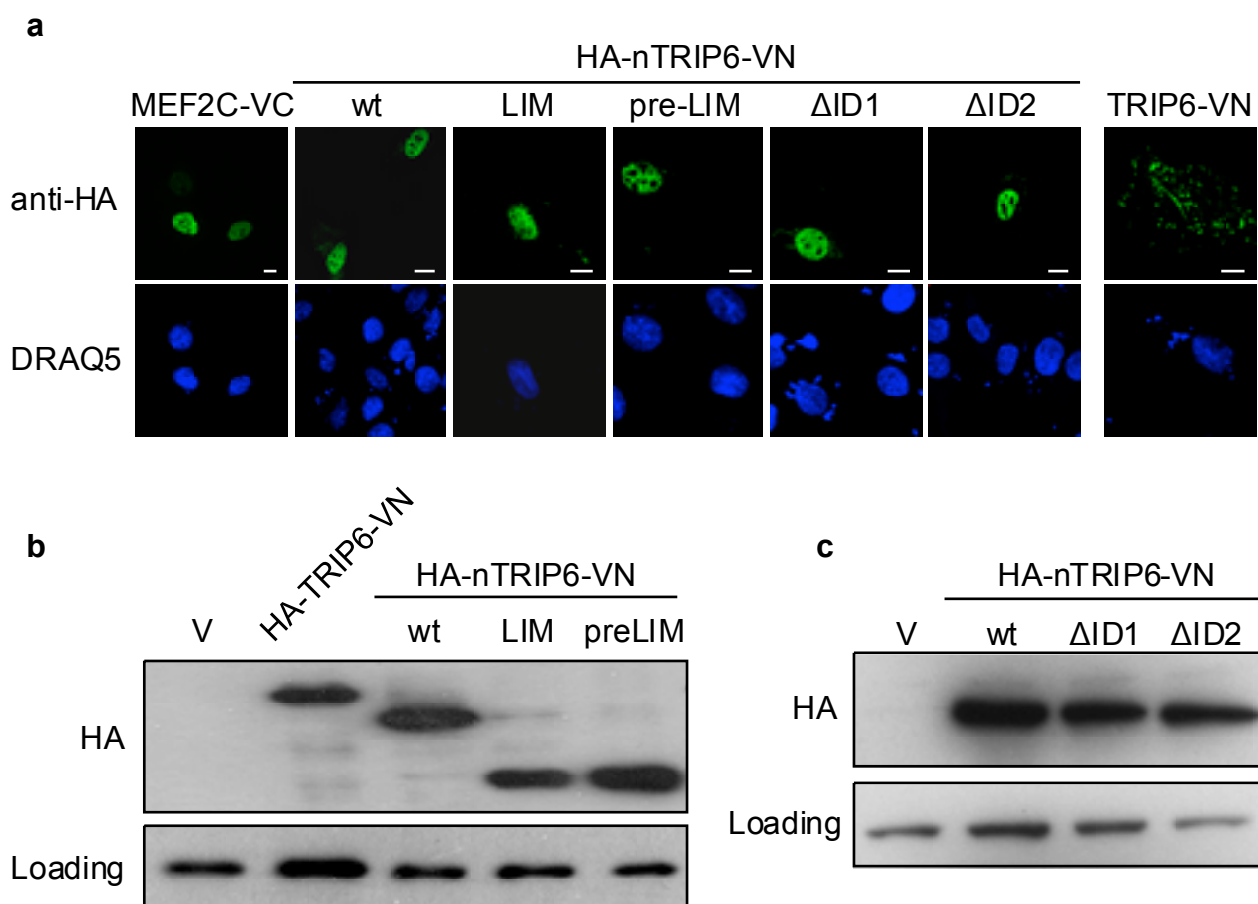

**Supplementary Fig. S1. Expression of the construct used in Fig. 2.** C2C12 cells were transfected with the indicated expression vectors (V, empty vector) and subjected to immunofluorescence analysis using an anti-HA antibody followed by nuclear counterstaining with DRAQ5 (a), or to Western Blotting using an anti-HA antibody and an anti-GR antibody as loading control (b,c). Scale bar in a: 10 $\mu$ m.

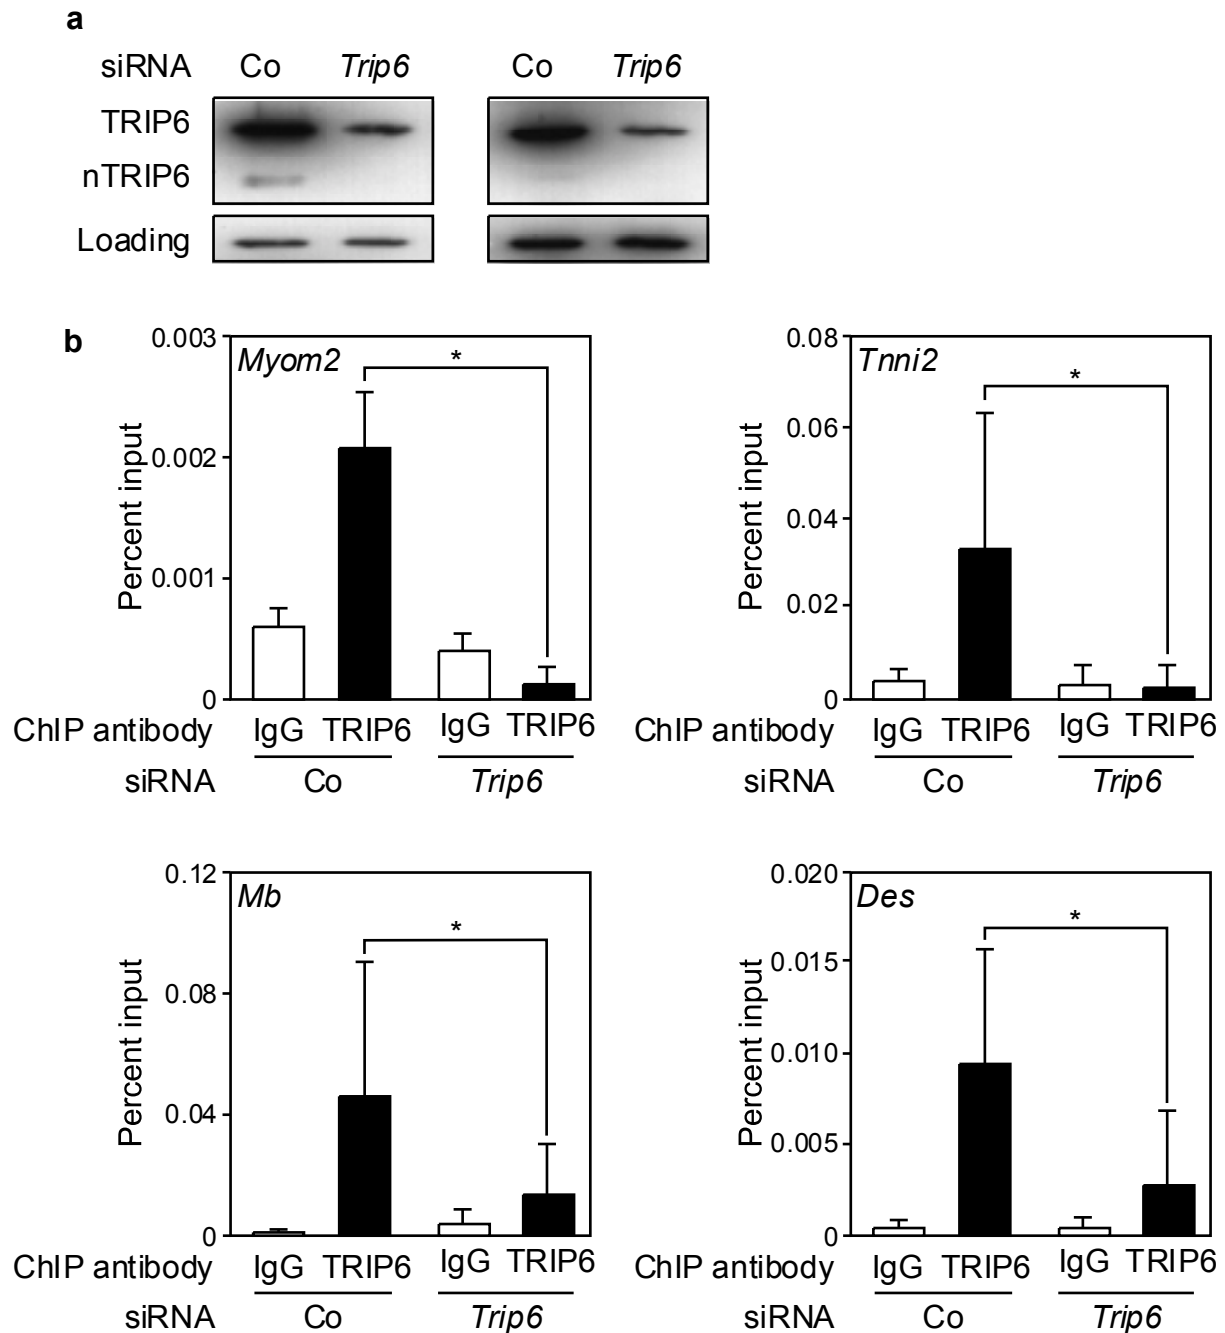

**Supplementary Fig. S2. Validation of the anti-TRIP6 rabbit monoclonal antibody.**

C2C12 cells were transfected with either an siRNA targeting *Trip6* mRNA or a control siRNA (Co). (a) Cell lysates were subjected to Western Blotting using the anti-TRIP6 rabbit monoclonal antibody (left) or a commercially available anti-TRIP6 antibody as a control (right), and an anti-GR antibody as a loading control. (b) Chromatin immunoprecipitation (ChIP) was performed using an isotype control antibody (IgG) or the anti-TRIP6 rabbit monoclonal antibody. Enrichments of the MEF2C binding region of the indicated genes were determined by real-time PCR and are plotted as percent of input (mean  $\pm$  SD of three independent experiments; \*,  $P < 0.05$ ).

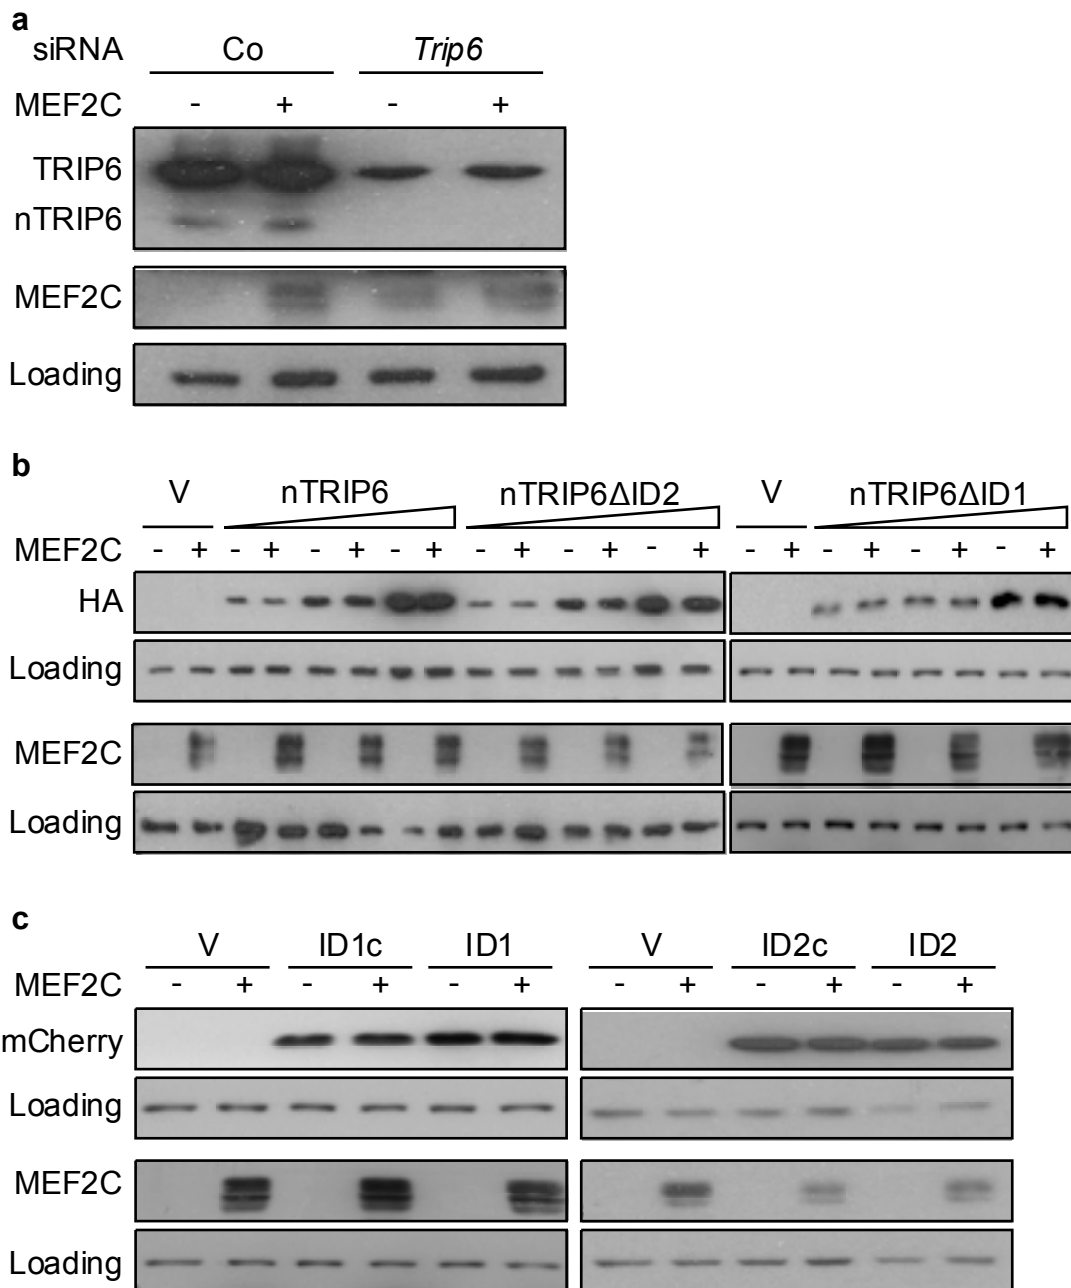

**Supplementary Fig. S3. Expression controls of the experiments presented in Fig. 4.** Cell lysates from the reporter gene assays presented in Fig.4a (a), Fig. 4b (b) and Fig. 4c (c) were subjected to Western Blotting using the indicated antibodies and an anti-GR antibody as a loading control.

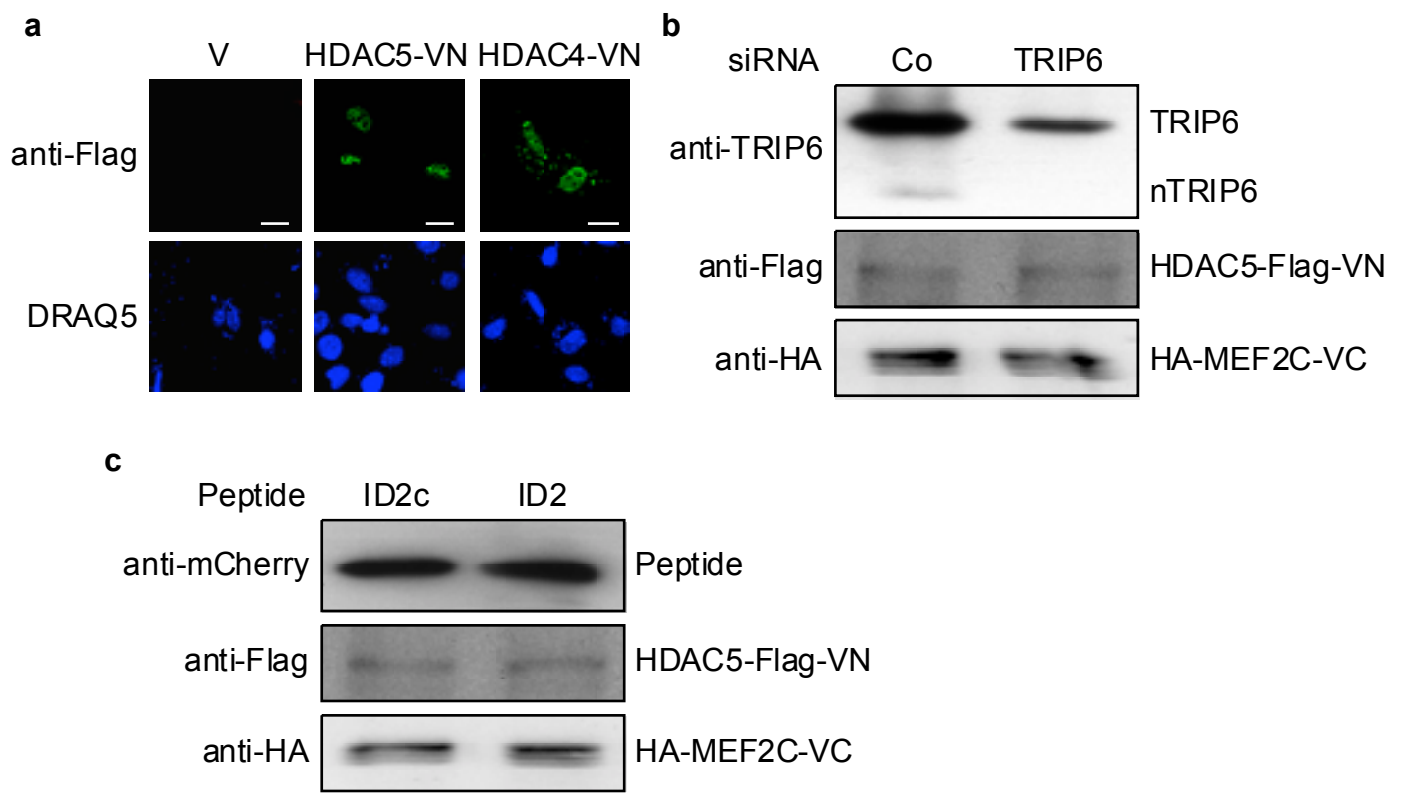

**Supplementary Fig. S4. Expression controls of the experiments presented in Fig. 5 and Fig. 6.** (a) C2C12 cells were transfected with either an empty vector (V) or an expression vector for either HDAC5 or HDAC4 fused to VN and subjected to immunofluorescence analysis using an anti-Flag antibody followed by nuclear counterstaining with DRAQ5. Scale bar: 20 $\mu$ m. (b,c) Cell lysates from the BiFC assays presented in Fig. 6a (b) and Fig. 6b (c) were subjected to Western Blotting using the indicated antibodies.

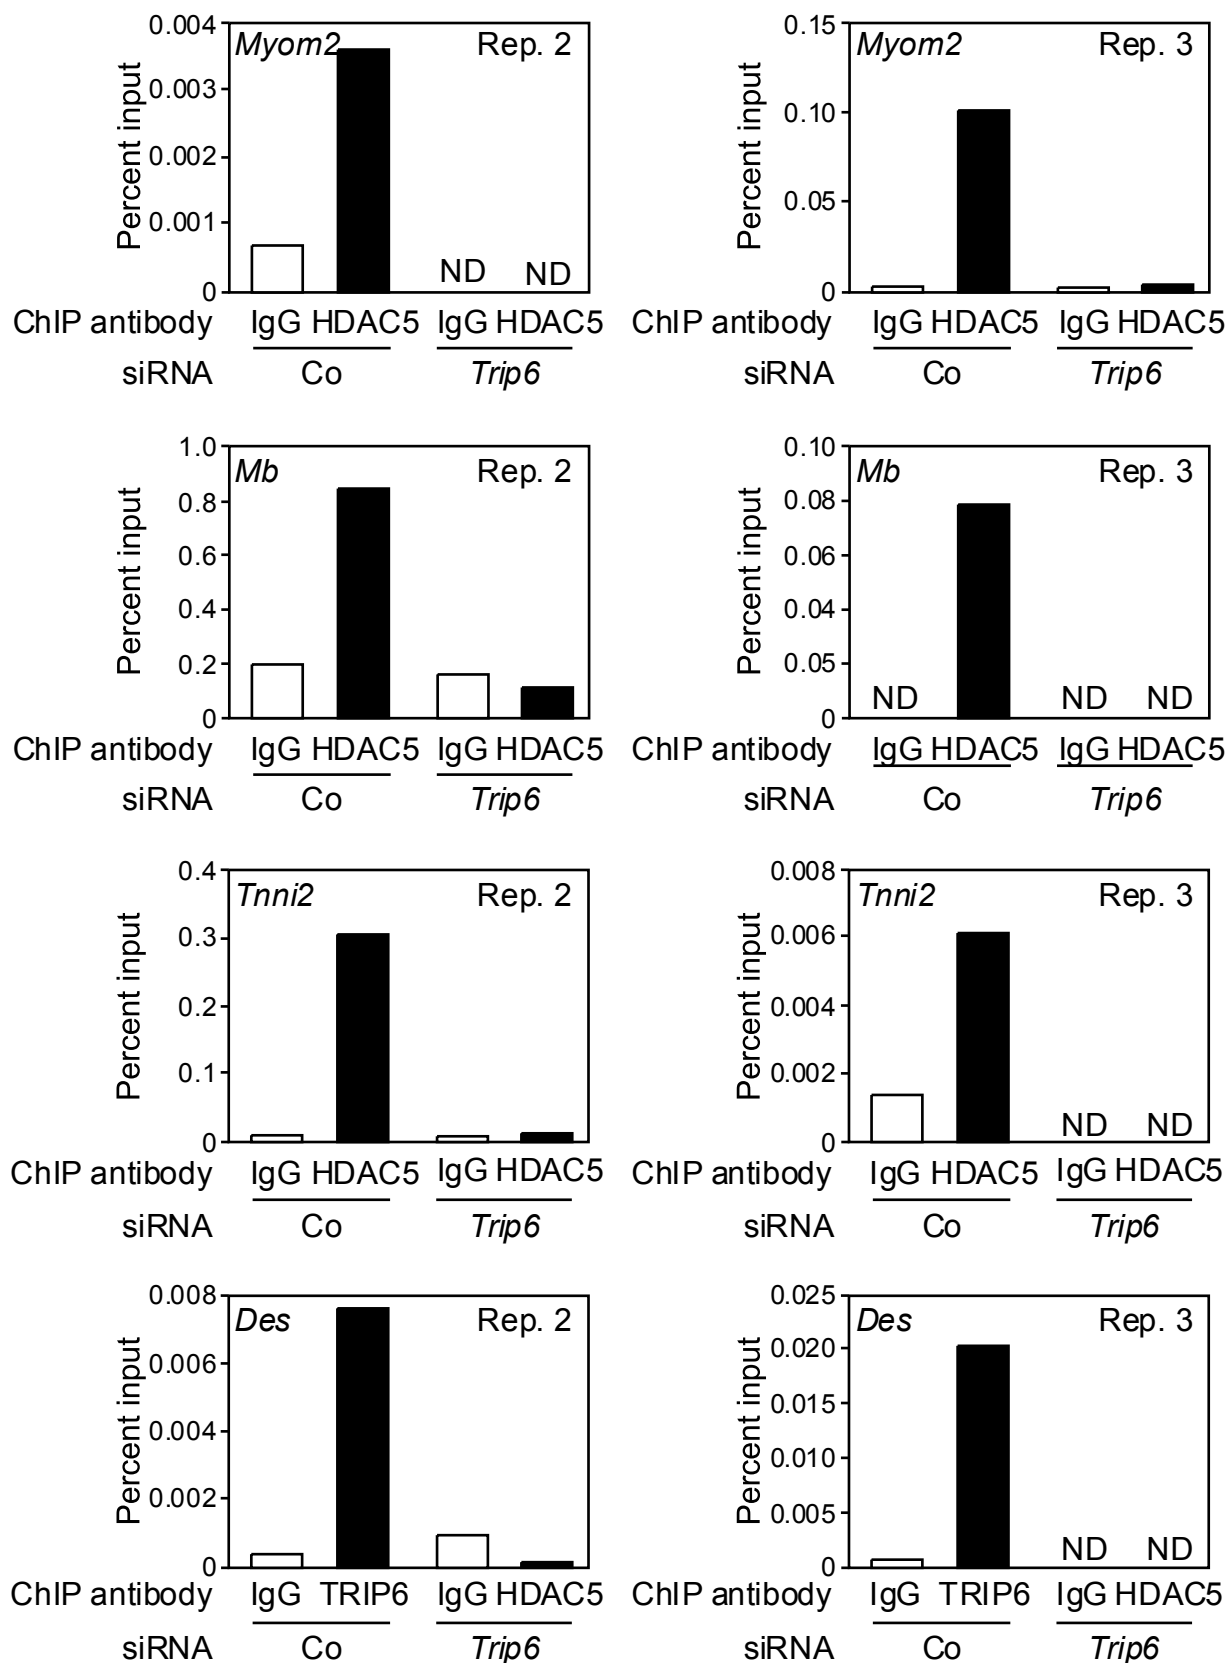

**Supplementary Fig. S5. nTRIP6 mediates the recruitment of HDAC5 to MEF2C target promoters.** Repetitions (Rep.) of the chromatin immunoprecipitation experiments presented in Fig. 7c. See legend of Fig. 7 for details.

## Supplementary Tables

Supplementary Table S1: Real-time PCR primers

| Gene name | Forward primer (5' to 3') | Reverse primer (5' to 3') |
|-----------|---------------------------|---------------------------|
| Des       | CGAGCTCTACGAGGAGGAGA      | GCCTCTGCAGGTCGTCTATC      |
| Mb        | AGCTGGTGCTGAATGTCTGG      | AACAGACCGATGAGGACTTCC     |
| Myom2     | AAAAGACACAAGCACTTTGACC    | TGGGAGGATGACTGGGTGG       |
| Rplp0     | GGACCCGAGAAGACCTCCTT      | GCACATCACTCAGAATTTCAATGG  |
| Tnni2     | CATGGAGGTGAAGGTGCAGA      | CTCTTGAACCTGCCCTCAGG      |

Supplementary Table S2: ChIP PCR primers

| Gene name | Forward primer (5' to 3') | Reverse primer (5' to 3') |
|-----------|---------------------------|---------------------------|
| Des       | CCCAGAACGCCTCTCCTGTACCTT  | CAGCCGTCTCCCTAGCAGCAACA   |
| Mb        | GGGCTTGTGCAAGTCCAGACAGTG  | CCCTTCCTGCTACCGTGCTCAAC   |
| Myom2     | GAGCAGAGTACCCTGGGACG      | TTATGGCCAGAGGAGGTGCTA     |
| Tnni2     | GCTGGCATCTTGAACCTCGTC     | TCAGAAAGGGCATGGAGTCTC     |

## **Supplementary Material and Methods**

### **Western blotting**

Western blot analyses were performed using a custom made anti-TRIP6 (see main Materials and Methods section), a commercially available anti-TRIP6 (BD Transduction Laboratories), an anti-MEF2C (Cell Signaling, Leiden, Netherlands), an anti-HA (clone 3F10, Roche Applied Science, Mannheim, Germany), an anti-Flag (Sigma-Aldrich, Taufkirchen, Germany), an anti-mCherry (abcam, Cambridge, UK) and an anti-GR (clone 4H2; Novocastra) which was used as a loading control.
